## THE EFFECTS OF BRANCHIAL DENERVATION AND PSEUDOBANCH ABLATION ON CARDIOVENTILATORY CONTROL IN AN AIR-BREATHING FISH

BY DAVID J. MCKENZIE\*, MARK L. BURLESON† AND  
DAVID J. RANDALL

*Department of Zoology, 6270 University Boulevard, University of British  
Columbia, Vancouver, BC, Canada, V6T2A9*

*Accepted 17 July 1991*

### Summary

The role of sensory afferent information from the gills of *Amia calva* in cardiovascular and ventilatory control was investigated by bilateral branchial denervation and pseudobranch ablation.

Aquatic hypoxia or 1 mg of sodium cyanide (NaCN) in the water flowing over the gills stimulated bradycardia, and gill and air ventilation in sham-operated fish. Sodium cyanide, noradrenaline (NA) and adrenaline (A) infusion into the dorsal aorta increased gill ventilation, and NA and A infusion also stimulated tachycardia and an increase in blood pressure.

Following denervation and pseudobranch ablation,  $O_2$  consumption ( $\dot{V}O_2$ ), air-breathing frequency ( $f_{AB}$ ) and arterial  $O_2$  tension ( $P_{aO_2}$ ) declined, and circulating NA levels increased, as compared with sham-operated fish. Cardiovascular and air-breathing responses to hypoxia were abolished and gill ventilatory responses attenuated. All ventilatory and cardiovascular responses to NaCN were abolished and gill ventilatory responses to NA and A were attenuated in animals following denervation and pseudobranch ablation.

These results demonstrate that  $O_2$ -sensitive chemoreceptors in the gills and pseudobranch control reflex bradycardia and air-breathing responses in *Amia*, but that gill ventilatory responses to hypoxia, NA and A are partially mediated by extrabranchial mechanisms. Plasma NA levels increased during hypoxia in sham-operated and denervated animals, indicating that circulating NA may have mediated gill ventilatory responses in denervated animals.

### Introduction

*Amia calva* is a primitive fish with the ability to breathe both air and water. It

\* Present address and address for reprint requests: Istituto di Scienze Farmacologiche, via Balzaretti 9, Università di Milano, Milano 20133, Italy.

† Present address: Section of Comparative Physiology, Department of Biology, University of Texas at Arlington, Arlington, TX 76019, USA.

**Key words:** *Amia calva*, air-breathing fish, chemoreceptors, gills, glossopharyngeal nerve, vagus nerve, hypoxia, NaCN, catecholamines, ventilatory control.

possesses a swimbladder adapted to function as an air-breathing organ and gills for water-breathing. Relatively little is known about control of reflex ventilatory and cardiovascular responses to respiratory gases in *Amia* or air-breathing fish in general. Air-breathing and gill ventilation are stimulated by aquatic hypoxia in *Amia* (Johansen *et al.* 1970; Randall *et al.* 1981), and ventilatory responses to blood hypercapnia and acidosis do not occur unless they are associated with a reduction in blood O<sub>2</sub> content (McKenzie *et al.* 1991). This indicates that ventilatory control in *Amia* is similar to that observed in purely water-breathing fish, where blood and water O<sub>2</sub> status are the primary stimuli for cardioventilatory reflex responses (Randall and Jones, 1973; Smith and Jones, 1981; Randall, 1982).

There is much evidence indicating that hypoxic reflexes in fish are mediated by O<sub>2</sub>-sensitive chemoreceptors in the gills and pseudobranch, innervated by cranial nerves VII, IX and X. Nerve activity sensitive to internal and external O<sub>2</sub> levels has been recorded from nerve X to the first gill arch of tuna (Milsom and Brill, 1986) and nerve IX to the first gill arch of trout (Burluson and Milsom, 1990).

Section of cranial nerves IX and/or X to the gill arches abolishes reflex bradycardia in response to aquatic hypoxia or NaCN (a potent chemoreceptor stimulant) in various teleost species (Smith and Jones, 1978; Fritsche and Nilsson, 1989; Burluson and Smatresk, 1990a). In elasmobranchs, nerves V and VII innervating the buccal cavity also require sectioning (Butler *et al.* 1977).

Complete branchial denervation abolishes ventilatory reflex responses to hypoxia in anaesthetised, spontaneously ventilating *Ictalurus punctatus* (Burluson and Smatresk, 1990a) and *Lepisosteus oculatus*, an air-breathing fish (Smatresk, 1991). The failure of branchial denervation to abolish ventilatory reflex responses completely in various other species (Hughes and Shelton, 1962; Saunders and Sutterlin, 1971) has been attributed to the existence of an extrabranchial O<sub>2</sub>-sensitive chemoreceptor (Bamford, 1974) or to afferent information arising from the pseudobranch and/or nerves serving one particular gill arch, which were left intact (Smatresk, 1991). In channel catfish, O<sub>2</sub> sensitivity is located diffusely throughout the gills, and one branchial nerve left intact unilaterally is sufficient to stimulate a ventilatory response (Burluson and Smatresk, 1990a).

Recent evidence, however, suggests that ventilatory responses to hypoxia and acidosis in dogfish and trout may be mediated humorally by the circulating catecholamines NA and A, possibly *via* a direct effect on central respiratory motoneurons (Randall and Taylor, 1989; Taylor and Randall, 1988; Aota *et al.* 1990). There is evidence to suggest that circulating catecholamines play a role in gill ventilatory responses to acidosis in *Amia* (McKenzie *et al.* 1991).

The present study in *Amia* employed total branchial denervation (branchial branches of cranial nerves IX and X) and pseudobranch ablation to investigate the role of O<sub>2</sub>-sensitive chemoreceptors in the gills and pseudobranch in reflex cardiovascular, air-breathing and gill ventilatory responses to hypoxia, sodium cyanide (NaCN) and catecholamines, and also to investigate the role of circulating catecholamines in reflex gill ventilatory responses to hypoxia. Sodium cyanide was used as a stimulant for O<sub>2</sub>-sensitive chemoreceptors (Lahiri *et al.* 1970; Burluson

and Smatresk, 1990a; Smatresk, 1986). A conscious animal preparation was used to avoid the effects of anaesthesia, which may compromise cardiovascular and ventilatory reflex responses.

## Materials and methods

### *Experimental animals*

*Amia* weighing 400–1000 g were netted in Lake Erie and air-freighted to UBC, where they were maintained in a large outdoor fibreglass tank supplied with dechlorinated Vancouver tapwater (pH approx. 6.5, 7–12°C). Fish were fed a diet of live goldfish and salmon fry. Before experimentation, *Amia* were placed in Plexiglas holding tanks and the water temperature was raised to 20°C, over a 3- to 5-day period, to increase air-breathing frequency (Johansen *et al.* 1970).

### *Animal preparation*

Animals were anaesthetized in a tricainemethanesulphonate (MS-222) solution at a concentration of 0.01%, buffered with sodium bicarbonate. Following transfer to an operating table, fish were artificially ventilated with a buffered MS-222 solution at 0.005%, oxygenated with 100% O<sub>2</sub> to prevent hypoxia during surgery when only half of the gills were ventilated. A dorsal aortic cannula (PE 50, Intramedic) was implanted using the technique of Soivio *et al.* (1972). A buccal cannula was fitted using flared PE 50 (Intramedic) passed through a small hole in the roof of the mouth and secured with a cuff and sutures. An opercular cannula was fitted using flared PE 190 (Intramedic) passed through a small hole in the operculum and secured with a cuff and sutures. The operculum was reflected forward and a small incision made in the epithelium dorsal and posterior to the fourth gill arch. This allowed access to the branchial branches of cranial nerve X, serving all four gill arches. These were gently dissected free of connective tissue and sectioned with iris scissors, care being taken not to damage gill vasculature or musculature. Cardiac and visceral branches (including that to the swimbladder) of nerve X were left intact. The incision was closed with absorbable sutures (Ethicon 2.0). Cranial nerve IX serving the first gill arch was exposed by making a small incision at the base of the gill filaments where the arch meets the roof of the opercular cavity, and dissecting the nerve free of connective tissue. The nerve was then sectioned with iris scissors. The pseudobranch in *Amia* is glandular and situated in the roof of the mouth just anterior to the first gill arch. It was exposed *via* a small incision and removed by cautery. The same procedure was followed on the other side so that denervation and pseudobranch ablation were bilateral. Surgery took between 30 and 40 min and all nerve sections were confirmed *post mortem*, by dissection. Sham-operated animals had gill nerves exposed as described, but not sectioned.

Following surgery, fish were transferred to individual darkened Plexiglas chambers, ventilated with water until ventilatory movements resumed and then allowed to recover for 48 h with a continuous flow of aerated water (approx.

900 ml kg<sup>-1</sup> min<sup>-1</sup>) through the chamber. The anterior end of the chamber had an air space to allow air-breathing. The dorsal aortic cannula was flushed twice daily with heparinised saline.

### Protocol

Following recovery, oxygen consumption ( $\dot{V}_{O_2}$ ) was measured in both denervated and sham-operated fish (see below for analytical methods). Subsequently, the water-filled opercular cannula was attached to a pressure transducer (Statham P23BB), allowing measurement of ventilation rate ( $f_G$ , beats min<sup>-1</sup>) and opercular pressure amplitude ( $P_{OP}$ , kPA). Opercular pressure amplitude was used as an index of ventilatory effort. The saline-filled dorsal aortic cannula was attached to a pressure transducer (Statham P23Db) for measurement of heart rate ( $f_H$ , beats min<sup>-1</sup>) and dorsal aortic blood pressure ( $P_{DA}$ , kPA). The output from both transducers was displayed on a pen recorder (Gould 8188-2202-XX). Air-breathing frequency ( $f_{AB}$ , breaths h<sup>-1</sup>) was visible as large pressure excursions on the opercular trace, associated with changes in  $f_H$  and  $P_{DA}$ . Air breaths were all verified visually through a small hole in a screen separating experimenter and fish.

Ventilatory and cardiovascular responses to a variety of different stimuli were measured in sham-operated and denervated animals. Experiments on any one fish were performed over a 2 day period, with overnight recovery between days. No experiments were initiated until ventilatory and cardiovascular variables had remained stable for 30 min. Animals were exposed to the following treatments, assigned randomly.

*Aquatic hypoxia.* Using a three-way valve at the inflow of the Plexiglas chamber, animals were acutely exposed to hypoxic water [ $O_2$  partial pressure ( $P_{O_2}$ ) =  $6.31 \pm 0.16$  kPa] obtained by bubbling 100%  $N_2$  counter-current to water flowing through a stripping column. Fish were exposed for 15 min, and then normoxic flow was resumed. Immediately prior to exposure, and following 5 min of exposure, arterial blood samples (700  $\mu$ l) were withdrawn anaerobically from the dorsal aortic cannula, *via* a three-way stopcock at the pressure transducer. Blood samples were replaced with an equal volume of heparinised saline. 500  $\mu$ l of blood was immediately centrifuged, the plasma decanted and frozen in liquid nitrogen for subsequent analysis of plasma catecholamine levels. Arterial blood pH (pHa),  $P_{O_2}$  ( $P_{aO_2}$ ) and  $O_2$  content ( $Ca_{O_2}$ ) were all measured on the remainder of the blood sample (see below for analytical methods). Animals were allowed a minimum of 2 h recovery following hypoxic exposure.

*External NaCN.* Either 1 ml of saline (control) or 1 mg of sodium cyanide (NaCN), dissolved in 1 ml of saline (experimental), was given as a bolus injection into the buccal cavity *via* the buccal cannula.

*Internal NaCN.* Either 300  $\mu$ l of heparinised saline (control) or 300  $\mu$ g of NaCN, dissolved in 300  $\mu$ l of saline (experimental), was delivered as a bolus injection *via* the dorsal aortic (DA) cannula.

*Catecholamine infusion.* 0.5 ml kg<sup>-1</sup> saline (control), 0.5 ml kg<sup>-1</sup>  $10^{-5}$  mol l<sup>-1</sup> noradrenaline hydrochloride (Sigma) in saline (experimental) or 0.5 ml kg<sup>-1</sup>

$10^{-5} \text{ mol l}^{-1}$  adrenaline bitartrate (Sigma) in saline (experimental) was infused *via* the DA cannula.

In all treatments, control and experimental injections or infusions were performed in random order. Animals were given a minimum of 30 min to recover between injections.

#### *Analytical methods*

Oxygen consumption was calculated for both aquatic and aerial phases. Steady-state measurements of  $P_{\text{O}_2}$  of inflow and outflow water were made using a Radiometer PHM 72 acid-base analyser and Radiometer  $\text{O}_2$  electrode thermostatted to  $20^\circ\text{C}$ . Oxygen consumption in the aquatic phase was then calculated by the Fick equation. Measurements of the decline in  $P_{\text{O}_2}$  in the sealed forward air-space over a 3 h period were used to calculate  $\dot{V}_{\text{O}_2}$  by air-breathing. Plexiglas chambers used for  $\text{O}_2$  consumption were those used by Randall *et al.* (1981). In that study, it was demonstrated that there was no exchange of gases between aquatic and aerial phases within the chamber.

Arterial blood pH and  $P_{\text{aO}_2}$  were measured using a Radiometer PHM 72 acid-base analyser and associated electrodes, thermostatted to  $20^\circ\text{C}$ . Arterial blood  $\text{O}_2$  content was measured on  $30 \mu\text{l}$  blood samples using the method of Tucker (1967) and a Radiometer electrode thermostatted to  $20^\circ\text{C}$ . Arterial plasma noradrenaline and adrenaline concentrations ( $[\text{NA}]$  and  $[\text{A}]$ , respectively) were measured on alumina-extracted samples by high performance liquid chromatography with electrochemical detection, using a Waters plasma catecholamine reverse-phase column, Waters M460 electrochemical detector and Waters 510 solvent delivery pump (Waters/Millipore), as described by Woodward (1982), with peaks generated on a chart recorder. Catecholamine concentrations were calculated by integrating the area under the peaks with Sigmascan (Jandel Scientific) and an Olivetti M24 computer, and comparing with appropriate standards.

#### *Data analysis*

Ventilatory and cardiovascular responses were analysed for a control period and at designated intervals following each experimental intervention. Ventilation and heart rate were counted for 30 s in each minute, and  $\text{POP}$  and  $\text{PDA}$  were averaged from six measurements within that period; for 2 min control and at 1, 2.5, 5, 10 and 15 min following intervention. Air-breathing frequency was averaged for the whole measurement period following intervention. When a blood sample was withdrawn, cardiovascular measurements were made at 4 min.

Cardiovascular and gill ventilatory responses were normalised as percentage change from control and, following arcsine transformation, compared at each time interval with an analysis of variance (ANOVA). In those cases where the ANOVA indicated a significant difference amongst time intervals, each time interval was compared *a posteriori* with the control value. Gill ventilatory responses to NA and A infusion were also assessed by comparing control and peak responses with a

paired *t*-test, using the normalised transformed values. Normalised responses were used for graphical display.

Blood measurements taken during aquatic hypoxia exposure were compared with measurements obtained immediately prior to hypoxia exposure with a paired *t*-test. Air-breathing frequency under control normoxic conditions was compared with  $f_{AB}$  under hypoxic conditions using a paired *t*-test. For NaCN and catecholamine infusions,  $f_{AB}$  following control (saline) injection was compared with  $f_{AB}$  following the associated experimental injection using paired *t*-tests. Air-breathing frequency was compared between sham-operated and denervated fish, for each experimental intervention, using unpaired *t*-tests.  $P < 0.05$  was taken as the fiducial limit of significance.

## Results

### *Resting variables*

Gill denervation and pseudobranch ablation resulted in a significant reduction in  $\dot{V}_{O_2}$ ,  $f_{AB}$  and  $P_{aO_2}$  and a significant increase in the level of circulating NA. At 20°C, in aquatic normoxia, sham-operated *Amia* obtained 0.1% of their total  $O_2$  uptake by air-breathing. Following gill denervation and pseudobranch ablation, animals (denervates) had a significantly reduced  $O_2$  consumption rate (30% lower than sham-operated *Amia*), and there was no  $O_2$  uptake by air-breathing (Table 1). Mean control values for  $P_{DA}$ ,  $f_H$ ,  $POP$  and  $f_G$  are also given in Table 1. There was no significant difference between sham-operated *Amia* and denervates for these variables, although denervates appeared to have a higher  $POP$ . During normoxia,  $f_{AB}$  was very low in the sham-operated *Amia*, usually zero, and only one denervate breathed air, on two occasions (Table 2). In normoxia, denervates showed no differences in  $pH_a$ ,  $Ca_{O_2}$  and  $[A]$  as compared with sham-operated *Amia*, but  $P_{aO_2}$  was significantly lower and  $[NA]$  significantly higher in denervates (Table 3).

Table 1. Normoxic values of  $\dot{V}_{O_2}$ ,  $P_{DA}$ ,  $f_H$ ,  $POP$  and  $f_G$

|                                                                 | Sham-operated <i>Amia</i> | Denervated <i>Amia</i> |
|-----------------------------------------------------------------|---------------------------|------------------------|
| $\dot{V}_{O_2}(t)$ (mg $O_2$ kg <sup>-1</sup> h <sup>-1</sup> ) | 52.8±4.9                  | 36.7±3.3*              |
| $\dot{V}_{O_2}(a)$ (mg $O_2$ kg <sup>-1</sup> h <sup>-1</sup> ) | 0.06±0.02                 | 0*                     |
| $\dot{V}_{O_2}(w)$ (mg $O_2$ kg <sup>-1</sup> h <sup>-1</sup> ) | 52.7±4.9                  | 36.6±3.3*              |
| $P_{DA}$ (kPa)                                                  | 2.88±0.01                 | 2.98±0.006             |
| $f_H$ (beats min <sup>-1</sup> )                                | 30.0±0.11                 | 25.6±0.04              |
| $POP$ (kPa)                                                     | 0.066±0.0001              | 0.156±0.001            |
| $f_G$ (beats min <sup>-1</sup> )                                | 12.2±0.09                 | 10.7±0.05              |

Values are means±s.e.; \* denotes significantly different ( $P=0.05$ ) from sham-operated;  $N=6$  for sham  $\dot{V}_{O_2}$ ;  $N=7$  for denervate  $\dot{V}_{O_2}$ .

Cardiovascular and ventilatory variables are the mean of 48 measurements on six sham-operated *Amia* and 74 measurements on seven denervates.

$\dot{V}_{O_2}$ , oxygen consumption, (t) total, (a) air-breathing, (w) water-breathing;  $P_{DA}$ , dorsal aortic blood pressure;  $POP$ , opercular pressure amplitude;  $f_H$ , heart rate;  $f_G$ , gill ventilation rate.

*Effects of aquatic hypoxia*

In sham-operated *Amia*, acute exposure to aquatic hypoxia elicited significant cardiovascular and ventilatory responses (Fig. 1). A gradually developing bradycardia was evident, with  $f_H$  significantly reduced following 15 min of exposure. Gill ventilation increased, with significant changes in  $Pop$  and  $f_G$  at 5 min that were sustained until the end of hypoxic exposure. Air-breathing frequency increased significantly (Table 2), with most of the air-breaths occurring in the first 5 min of hypoxic exposure. At 5 min of exposure,  $pHa$  and  $Ca_{O_2}$  were maintained at pre-exposure values, but  $Pa_{O_2}$  decreased significantly. Arterial NA concentrations increased, but there was no significant effect on  $[A]$  (Table 3).

In denervates, the response to aquatic hypoxia was distinctly different (Fig. 1). The bradycardia response was abolished. Gill ventilation did not increase until 10 min of exposure, with a sustained increase in  $f_G$  and a transient increase in  $Pop$  that was no longer evident at 15 min. There was no change in  $f_{AB}$  during hypoxia, and air-breathing responses were abolished (Table 2). At 5 min of exposure,  $pHa$  was not changed from pre-exposure values. Arterial blood  $O_2$  content was not maintained at the pre-exposure value but decreased significantly, as did  $Pa_{O_2}$ . The

Table 2. Air-breathing frequency (breaths  $h^{-1}$ )

|                        | Sham-operated<br><i>Amia</i> | Denervated<br><i>Amia</i> | Partially denervated<br><i>Amia</i> |
|------------------------|------------------------------|---------------------------|-------------------------------------|
| Hypoxia                | 5.1±1.5                      | 0†                        | —                                   |
| External saline        | 0                            | 0.7±0.7                   | 0                                   |
| External NaCN          | 1.33±0.9                     | 0.7±0.7                   | 4.0±1.3*                            |
| Internal saline        | 0.7±0.7                      | 0                         | —                                   |
| Internal NaCN          | 0                            | 0                         | —                                   |
| Noradrenaline infusion | 0                            | 0                         | —                                   |
| Adrenaline infusion    | 0                            | 0                         | —                                   |

Values are mean±s.e.; †denotes significantly different from sham-operated, hypoxia ( $P=0.05$ ); \* denotes significantly different ( $P=0.05$ ) from sham-operated, saline injection.

$N=6$  for sham-operated *Amia*, 7 for denervates, and 7 for partial denervates.

Table 3. Arterial pH, blood gases and noradrenaline and adrenaline concentrations

|                        | pHa       | $Pa_{O_2}$<br>(kPa) | $Ca_{O_2}$<br>(kPa) | [Noradrenaline]<br>( $nmol\ l^{-1}$ ) | [Adrenaline]<br>( $nmol\ l^{-1}$ ) |
|------------------------|-----------|---------------------|---------------------|---------------------------------------|------------------------------------|
| Sham-operated normoxia | 7.72±0.02 | 6.2±1.6             | 0.59±0.1            | 25.3±3.7                              | 5.2±3.0                            |
| Sham-operated hypoxia  | 7.73±0.03 | 3.7±0.6*            | 0.41±0.05           | 42.6±5.9*                             | 7.8±3.1                            |
| Denervated normoxia    | 7.75±0.02 | 2.2±0.2†            | 0.51±0.09           | 90.0±17.3†                            | 18.9±8.5                           |
| Denervated hypoxia     | 7.72±0.02 | 1.5±0.2*            | 0.23±0.05*          | 132.7±25.6*                           | 86.4±38.5                          |

Values are mean±s.e.; \* denotes significantly different from normoxic control; † denotes significantly different from sham-operated normoxic control.

$N=6$  for both sham-operated *Amia* and denervates.

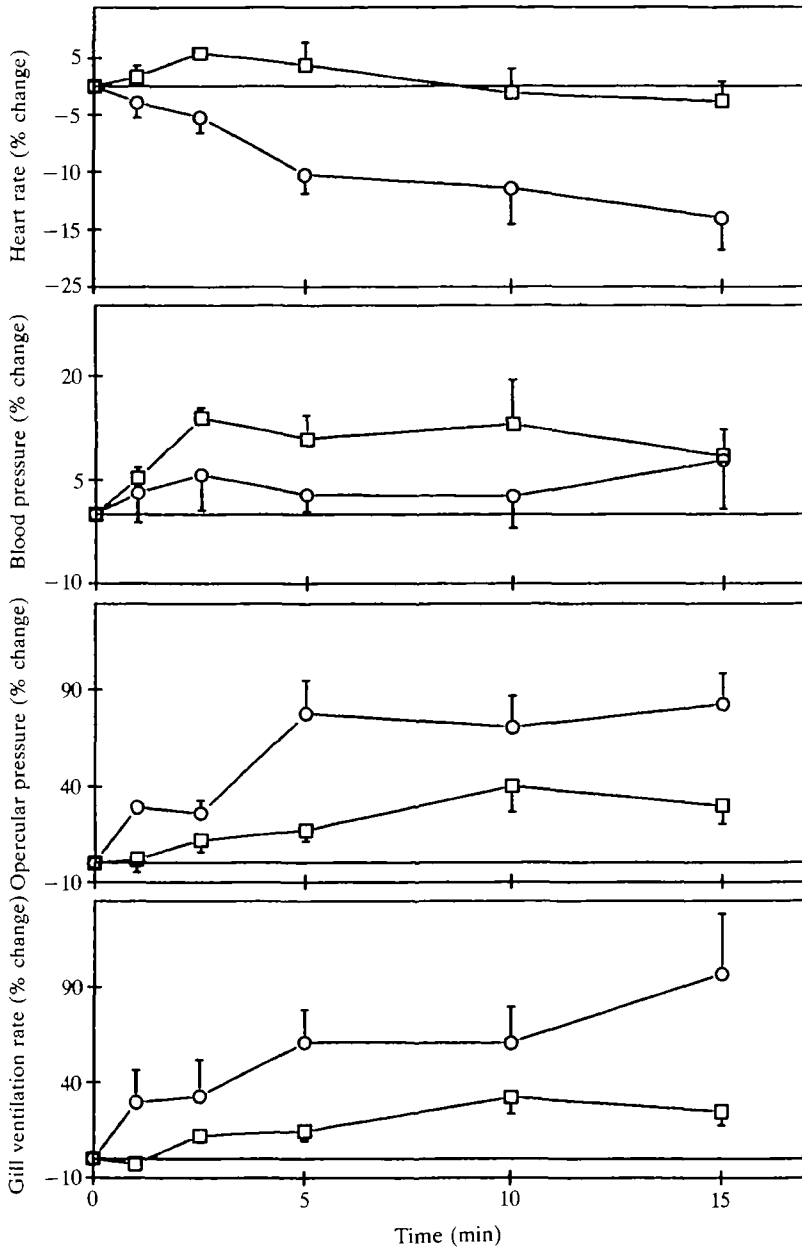

Fig. 1. Average response (normalised as mean percentage change from control,  $\pm 1$  s.e.m.) of dorsal aortic peak systolic blood pressure ( $P_{DA}$ ), heart rate ( $f_H$ ), opercular pressure amplitude ( $P_{OP}$ ) and gill ventilation rate ( $f_G$ ) in sham-operated ( $\circ$ ) and denervated ( $\square$ ) *Amia* during 15 min of exposure to aquatic hypoxia ( $P_{O_2} = 6.31 \pm 0.16$  kPa).  $N=6$ .



concentration of circulating NA increased, but there was no significant effect on [A] (Table 3).

#### *Effects of NaCN*

In sham-operated *Amia*, bolus injection of NaCN into the buccal cavity (Fig. 2) elicited a transient bradycardia and a transient increase in *POP*. Arterial blood pressure and *fg* did not change significantly from control values. In two out of six fish, external NaCN immediately stimulated an air-breath (Table 2) but, overall, NaCN in the buccal cavity had no significant effect on air-breathing. It is of interest to note that partial denervates (i.e. animals with a branchial branch of IX or X and/or the pseudobranch intact) showed an immediate and significant increase in *f<sub>AB</sub>* within 5 min following external NaCN (Table 2). External saline control injections had no effect on any variable (Fig. 2).

In denervates (Fig. 2), all cardiovascular and ventilatory responses to NaCN in the buccal cavity were abolished, with no significant change in any variable over time. One animal took an air-breath in response to both external saline and NaCN, but in the latter case at 13 min post-injection, which indicates that it was not in response to the NaCN (Table 2). Injection of a saline bolus into the buccal cavity had no effect on any variable (Fig. 2).

Bolus injection of NaCN into the dorsal aorta of sham-operated *Amia* had no significant effect on *P<sub>DA</sub>* and *f<sub>H</sub>*, but significantly stimulated *POP* and *fg* (Fig. 3). *POP* increased transiently at 2.5 min post-injection, and *fg* was elevated at 1 and 2.5 min. Internal NaCN had no effect on *f<sub>AB</sub>* (Table 2), and injection of a saline bolus into the DA had no effect on any variable (Fig. 3).

In denervates (Fig. 3) the ventilatory responses to internal NaCN were abolished, with no significant changes in *POP* or *fg*. Cardiovascular variables showed a similar trend to those of sham-operated *Amia*; the changes over time were not statistically significant. There was no air-breathing response to internal NaCN in the denervates. Injection of a saline bolus had no effect on any variable (Fig. 3). Fig. 4 shows representative traces of cardiovascular and ventilatory responses to NaCN in sham-operated *Amia* and denervates.

#### *Effects of catecholamines*

In sham-operated *Amia*, NA infusion (Fig. 5) significantly increased *P<sub>DA</sub>*, *f<sub>H</sub>* and *POP*. There was no significant effect on *fg*, and no stimulation of *f<sub>AB</sub>*. Arterial blood pressure showed a transient increase at 2.5 min and *f<sub>H</sub>* was elevated at 2.5, 5 and 10 min following infusion. Opercular pressure amplitude was significantly elevated at 2.5 min post-infusion, and remained elevated throughout the remainder of the measurement period. Adrenaline infusion had similar effects to NA infusion on cardiovascular variables (Fig. 5), significantly increasing *P<sub>DA</sub>* from 1 min post-infusion until the end of the measurement period, but only transiently stimulating *f<sub>H</sub>*, at 2.5 min. There was no statistically significant stimulation of *POP* or *fg* by A, as assessed by ANOVA. However, a paired *t*-test showed a significant increase in mean *POP* and *fg* at 2.5 min post-infusion. There was no stimulation of

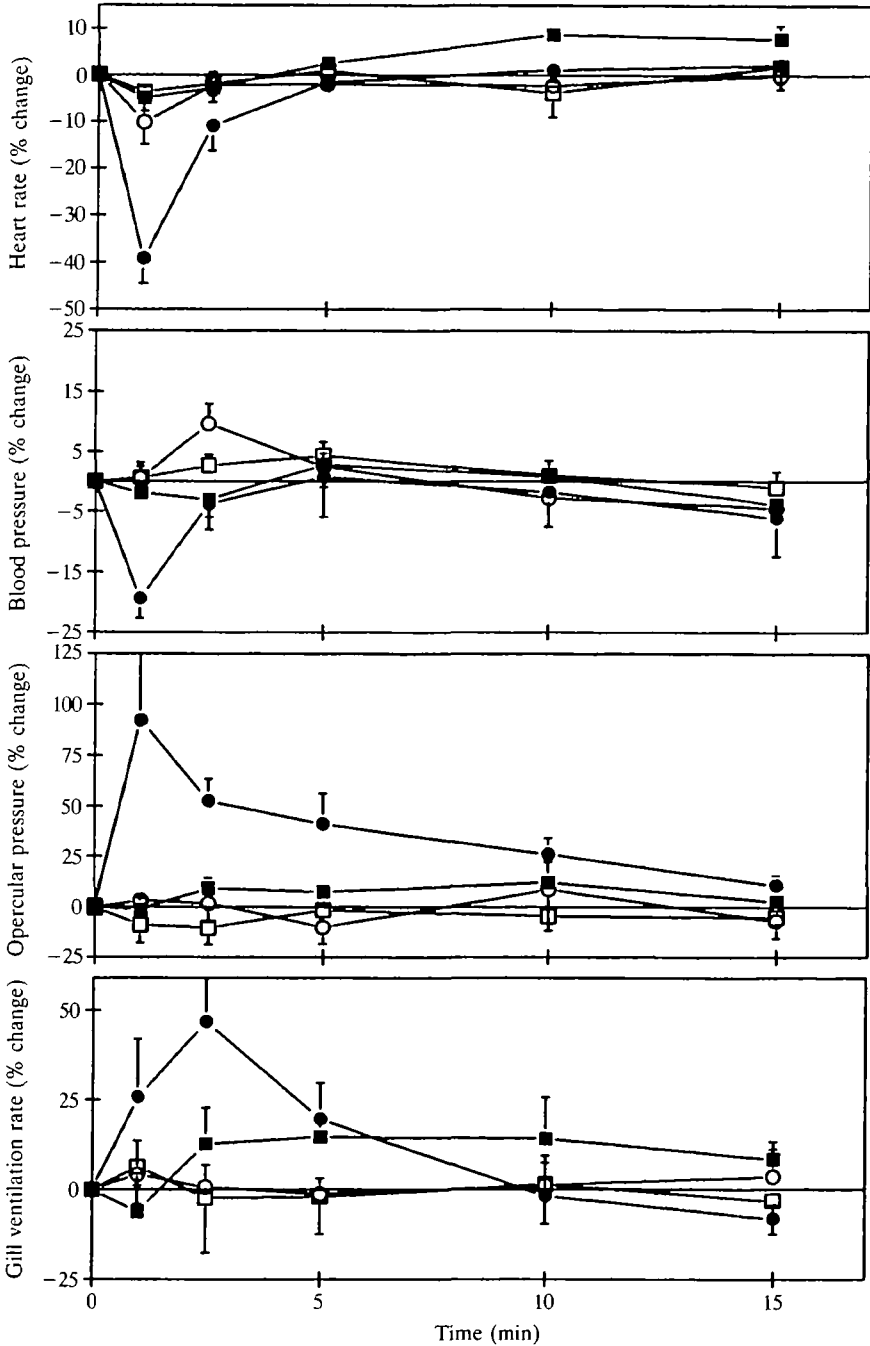

Fig. 2. Average response (normalised as mean percentage change from control,  $\pm 1$  s.e.m.) of dorsal aortic peak systolic blood pressure ( $P_{DA}$ ), heart rate ( $f_H$ ), opercular pressure amplitude ( $P_{OP}$ ) and gill ventilation rate ( $f_G$ ) in sham-operated (circles) and denervated (squares) *Amia* following injection of 1 mg of NaCN (filled symbols) or saline (open symbols) into the buccal cavity.  $N=6$  for sham-operated;  $N=7$  for denervates.

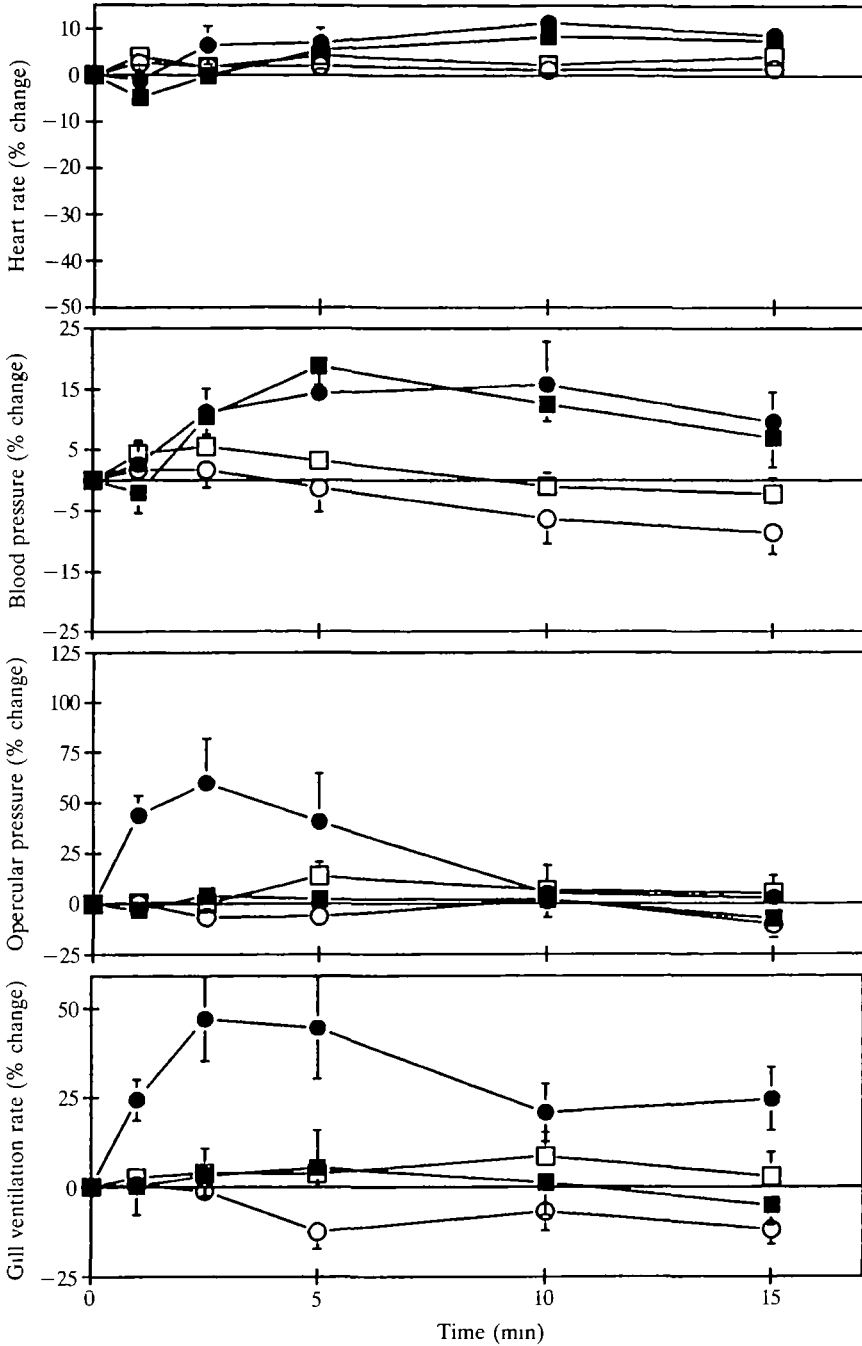

Fig. 3. Average response (normalised as mean percentage change from control,  $\pm 1$  s.e.m.) of dorsal aortic peak systolic blood pressure ( $P_{DA}$ ), heart rate ( $f_H$ ), opercular pressure amplitude ( $P_{OP}$ ) and gill ventilation rate ( $f_G$ ) in sham-operated (circles) and denervated (squares) *Amia* following injection of 300  $\mu$ g of NaCN (filled symbols) or saline (open symbols) into the dorsal aorta.  $N=6$  for sham-operated;  $N=7$  for denervates.

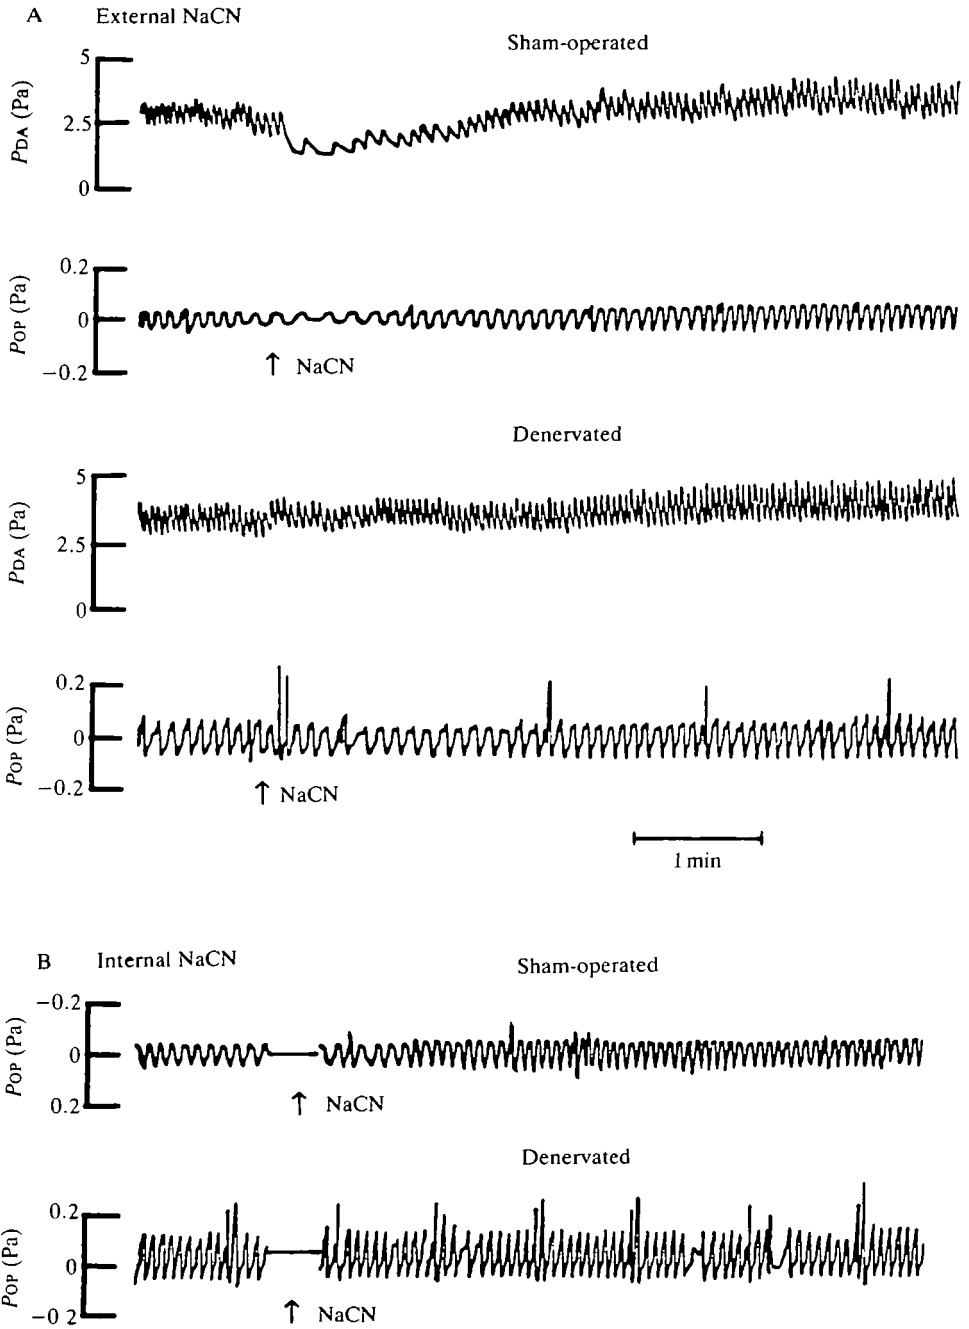

Fig. 4. Representative traces of cardiovascular and gill ventilatory responses to external (A) and internal (B) NaCN in sham-operated and denervated *Amia*.

$f_{AB}$  (Table 2). Control saline infusion had no effect on  $P_{DA}$ ,  $f_H$ ,  $POP$ ,  $f_G$  or  $f_{AB}$  (Fig. 5).

In denervated fish (Fig. 5), NA had effects on  $P_{DA}$  and  $f_H$  very similar to those seen in sham-operated *Amia*, but there was no statistically significant effect on  $POP$  or  $f_G$ , when measured by ANOVA. Adrenaline also stimulated  $P_{DA}$  and  $f_H$  in a manner similar to the response of the sham-operated fish. There was no significant effect on  $POP$  following A infusion, but  $f_G$  increased at 2.5, 5 and 10 min post-infusion, when measured by ANOVA. Whilst NA and A showed no statistically significant effect on  $POP$  as measured by ANOVA, a comparison of denervate mean control  $POP$  and  $f_G$  with mean  $POP$  and  $f_G$  at 2.5 min post-infusion, by paired *t*-test, shows a significant increase in both ventilatory variables at 2.5 min (this was not the case for NaCN exposure in denervates). Saline control infusion had no effect on any measured variable (Fig. 5).

### Discussion

The present study demonstrates that in *Amia*, section of all branchial branches of cranial nerves IX and X and extirpation of the pseudobranch abolish air-breathing and cardiac reflex responses to hypoxia and NaCN. Gill ventilatory responses to NaCN are abolished. Gill ventilatory responses to hypoxia and catecholamines are significantly attenuated. These results indicate that air-breathing and cardiac reflex responses to hypoxia are mediated by  $O_2$ -sensitive chemoreceptors in the gills and pseudobranch, innervated by cranial nerves VII, IX and X, but that gill ventilatory reflex responses are mediated to some extent *via* an extrabranchial pathway.

#### *Resting cardiovascular, ventilatory and blood-gas variables*

Gill denervation did not change any resting cardiovascular or gill ventilatory variables significantly. This indicates that the motor pathways to the buccal and opercular pumps were not damaged by surgery, and also that *Amia* is different from *L. oculatus*, where section of the branchial branches of cranial nerve IX significantly attenuates resting  $POP$  and  $f_G$  (Smatresk, 1991). A reduction or abolition of afferent information about water and blood  $O_2$  levels and abolition of all efferent vascular and postural motor control of the gill arches probably combined to result in the measured reduction in  $Pa_{O_2}$  and  $\dot{V}_{O_2}$  seen in denervated *Amia* as compared with sham-operated fish. The denervates, however, had similar  $Ca_{O_2}$  and  $pH_a$  values to sham-operated *Amia*, indicating that the former were not hypoxaemic and were not accumulating lactic acid as a result of anaerobic metabolism. Elevated circulating NA levels in denervated *Amia* indicate that they were more stressed than sham-operated *Amia*, as catecholamines are released into the circulation in response to stress in fish (Nakano and Tomlinson, 1967).

Sham-treated *Amia* did not breathe air as much during aquatic normoxia as noted by Johansen *et al.* (1970) and Randall *et al.* (1981). Denervated animals did not breathe air at all, except for one individual that did so on two occasions within

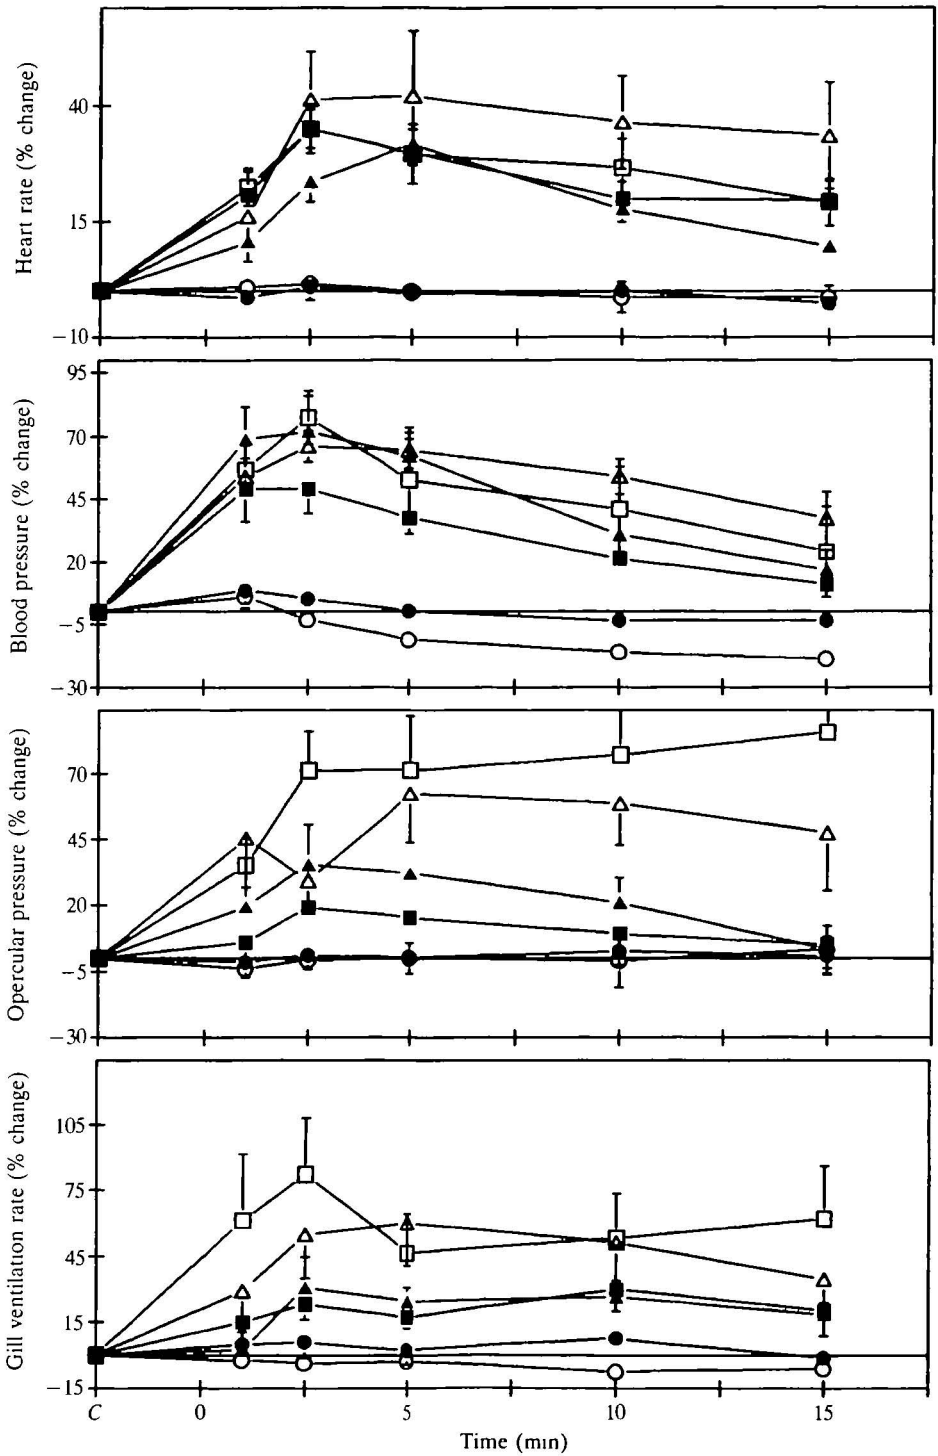

Fig. 5

Fig. 5. Average response (normalised as mean percentage change from control,  $\pm 1$  S.E.M.) of dorsal aortic peak systolic blood pressure ( $P_{DA}$ ), heart rate ( $f_H$ ), opercular pressure amplitude ( $POP$ ) and gill ventilation rate ( $f_G$ ) in sham-operated (open symbols) and denervated (filled symbols) *Amia* following infusion of  $1 \text{ ml kg}^{-1}$  of adrenaline (triangles) or noradrenaline (squares) into the dorsal aorta.  $N=6$ ,  $C$ , control.

---

1 h. This is similar to *L. oculatus*, where complete branchial denervation severely reduced resting  $f_{AB}$  (Smatresk, 1991). This indicates that air-breathing behaviour in both *Amia* and *L. oculatus* is mainly, but not entirely, dependent on afferent input from the gills.

#### *Effects of denervation on cardiovascular responses*

Abolition of the  $f_H$  response to hypoxia and external NaCN following gill denervation indicates that reflex bradycardia in *Amia* is controlled by  $O_2$ -sensitive chemoreceptors in the gills, as is the case in exclusively water-breathing teleosts, e.g. trout (Smith and Jones, 1978), cod (Fritsche and Nilsson, 1989) and channel catfish (Burlison and Smatresk, 1990a), where bradycardia is abolished by section of cranial nerves IX and X to the gills.

In sham-operated *Amia*, stimulation of a bradycardia by NaCN given in the buccal cavity, but not by NaCN infused into the dorsal aorta, supports previous studies that indicate that  $O_2$ -sensitive chemoreceptors mediating bradycardia are externally oriented (Saunders and Sutterlin, 1971; Burlison and Smatresk, 1990b). Cardiovascular responses by *Amia* to external and internal NaCN are similar to the responses of channel catfish (Burlison and Smatresk, 1990a,b) but contrast with the responses of the air-breathing fish *Lepisosteus osseus* (Smatresk, 1986; Smatresk *et al.* 1986). In *L. osseus*, heart rate is either not changed by external or internal NaCN (Smatresk, 1986) or internal NaCN produces a bradycardia (Smatresk *et al.* 1986).

In sham-operated *Amia* and denervates, stimulation of  $P_{DA}$  and  $f_H$  by catecholamines is probably a result of direct effects on the myocardium and peripheral vasculature (Wood and Shelton, 1980; Farrell *et al.* 1986).

#### *Effects of denervation on ventilatory responses*

Increases in  $POP$ ,  $f_G$  and  $f_{AB}$  following hypoxic exposure in sham-operated *Amia* were similar to the responses of most air-breathing fish (Smatresk, 1988). Denervates did not air-breathe during hypoxia, providing evidence that  $O_2$ -sensitive chemoreceptors stimulating this behaviour are located in the gills or pseudobranch. This is similar to the African lungfish *Protopterus aethiopicus* (Lahiri *et al.* 1970), where partial gill denervation attenuated the air-breathing response to hypoxia, and to *L. oculatus*, where complete branchial denervation abolished air-breathing and gill ventilatory responses to hypoxia (Smatresk, 1991).

Sham-operated *Amia* required large doses of NaCN to elicit ventilatory responses, as compared with *L. osseus* (Smatresk, 1986). In *L. osseus*, external

NaCN stimulated air-breathing but had no significant effect on gill ventilation (Smatresk, 1986), whereas in *Amia* there was an increase in gill ventilation but no significant effect on  $f_{AB}$ . *L. osseus* have reduced gills compared with purely water-breathing fish (Smatresk and Cameron, 1982) but *Amia* do not (Daxboeck *et al.* 1981). These facts suggest that under natural conditions *Amia* relies on air-breathing for  $O_2$  uptake less than does *L. osseus*, and demonstrate the variation in air-breathing strategies amongst fish.

Injections of NaCN into the dorsal aorta of sham-operated *Amia* stimulated a similar response to that seen in *L. osseus* (Smatresk, 1986), where internal NaCN significantly stimulated gill ventilation but not air-breathing. This is unlike the response of *P. aethiopicus*, where internally administered NaCN stimulated air-breathing (Lahiri *et al.* 1970). It is unknown whether internal and external NaCN injections stimulated the same or different groups of ventilatory reflex receptors in *Amia*.

It is interesting that hypoxia significantly stimulated air-breathing in sham-operated *Amia* but external and internal NaCN did not. It is possible, however, that two groups of  $O_2$ -sensitive receptors, oriented externally and internally, exist in *Amia* and that information from both receptor groups is integrated to produce a final air-breathing pattern. This is known to be the case in *L. osseus*, where internally oriented receptors set the level of hypoxic drive and externally oriented receptors set the balance of air-breathing vs gill ventilation (Smatresk *et al.* 1986). In *Amia*, during hypoxia, both groups may have been stimulated, leading to air-breathing. External or internal NaCN only stimulated one group of receptors, and thus only sometimes stimulated air-breathing. In incomplete denervates (i.e. animals with a branchial nerve and/or pseudobranch intact) external NaCN consistently stimulated air-breathing. Partial denervation may have affected the balance of information from both groups and led to more frequent air-breaths.

The complete abolition of all ventilatory responses to NaCN following branchial denervation and pseudobranch ablation clearly indicates that these reflexes are mediated by  $O_2$ -sensitive chemoreceptors situated in the gills and pseudobranch, innervated by cranial nerves VII, IX and X, and that following denervation *Amia* do not retain  $O_2$ -sensitive-chemoreceptor-mediated ventilatory reflexes. Thus, the  $Pop$  and  $fg$  responses seen in hypoxic denervates are not mediated by an extrabranchial  $O_2$ -chemoreceptor (Bamford, 1974).

Infusion of catecholamines into sham-operated *Amia* produced ventilatory effects similar to those seen in intact fish, with increases in  $Pop$  and  $fg$  but no change in  $f_{AB}$  (McKenzie *et al.* 1991). Following denervation, the ventilatory response to catecholamines was attenuated. Denervation of aortic and carotid bodies in mammals causes a reduction in ventilatory sensitivity to catecholamine infusion (Dempsey *et al.* 1986), suggesting that, in *Amia*, stimulation of gill ventilation by catecholamines may be largely *via* stimulation of  $O_2$ -sensitive chemoreceptors in the gills. It is also possible, however, that the elevated endogenous NA levels in denervated animals reduced ventilatory sensitivity to exogenous catecholamine infusion. The existence, however, of a ventilatory



response to catecholamine infusion in denervates clearly indicates that catecholamines stimulate ventilation *via* an extrabranchial pathway, possibly centrally. Catecholamines can cross the blood-brain barrier in fish (Nekvasil and Olson, 1986) and micro-injection of NA into the fourth ventricle stimulates 'fictive' ventilation in curarised dogfish (Taylor and Randall, 1988). It has been suggested that circulating catecholamines mediate ventilatory responses to hypoxia in trout and dogfish (Randall and Taylor, 1989; Taylor and Randall, 1988; Aota *et al.* 1990). The absence of an air-breathing response to catecholamine infusion in intact and denervated *Amia* indicates that catecholamines stimulate ventilation at a site, be it central or peripheral, that is not involved in controlling air-breathing. This suggests that some sites controlling reflex gill ventilatory responses are spatially and/or pharmacologically separate from sites controlling air-breathing reflexes.

Both sham-operated *Amia* and denervates showed a significant increase in [NA] following hypoxic exposure, which supports the view that circulating catecholamines are involved in ventilatory control. The complete abolition of all ventilatory responses to hypoxia following branchial denervation in anaesthetised, spontaneously breathing *I. punctatus* (Burleson and Smatresk, 1990a) and *L. oculatus* (Smatresk, 1991) may have occurred because these species are less sensitive to circulating NA than is *Amia*, or because the use of an anaesthetised preparation compromised ventilatory responses to catecholamines.

In conclusion, the removal of afferent information from the gills reduces resting  $\dot{V}_{O_2}$  in *Amia*. *Amia* possess two distinct groups of branchial O<sub>2</sub>-sensitive chemoreceptors. Reflex bradycardia is controlled by an externally oriented O<sub>2</sub>-sensitive chemoreceptor group, whereas ventilatory reflexes are mediated by both internal and external O<sub>2</sub>-sensitive receptors, or by a group sensitive to both internal and external conditions. Reflex air-breathing responses to hypoxia are mediated exclusively by O<sub>2</sub>-sensitive chemoreceptors in the gills, and *Amia* possess no extrabranchial O<sub>2</sub>-sensitive-chemoreceptor-mediated ventilatory reflexes. The evidence indicates that in denervated animals gill ventilatory responses to hypoxia may be mediated centrally by circulating catecholamines.

The authors would like to thank Mr S. Munger and Dr C. Wood for supplying the *Amia*. This research was supported by a Natural Sciences and Engineering Research Council of Canada grant to D.J.R., and a MacLean-Fraser Memorial Summer Fellowship to M.L.B.

### References

- AOTA, S., HOLMGREN, K. D., GALLAUGHER, P. AND RANDALL, D. J. (1990). A possible role for catecholamines in the ventilatory responses associated with internal acidosis or external hypoxia in rainbow trout (*Oncorhynchus mykiss*). *J. exp. Biol.* **151**, 57–70.
- BAMFORD, O. S. (1974). Oxygen reception in the rainbow trout (*Salmo gairdneri*). *Comp. Biochem. Physiol.* **11**, 131–137.
- BURLESON, M. L. AND MILSOM, W. K. (1990). Propranolol inhibits O<sub>2</sub>-sensitive chemoreceptor activity in trout gills. *Am. J. Physiol.* **258**, R1089–R1091.

- BURLESON, M. L. AND SMATRESK, N. J. (1990a). Effects of sectioning cranial nerves IX and X on cardiovascular and ventilatory reflex responses to hypoxia and NaCN in channel catfish. *J. exp. Biol.* **154**, 407–420.
- BURLESON, M. L. AND SMATRESK, N. J. (1990b). Evidence for two O<sub>2</sub> sensitive chemo-loci in catfish, *Ictalurus punctatus*. *Physiol. Zool.* **63**, 208–221.
- BUTLER, P. J., TAYLOR, E. W. AND SHORT, S. (1977). The effect of sectioning cranial nerves V, VII, IX and X on the cardiac response of the dogfish *Scyliorhinus canicula* to environmental hypoxia. *J. exp. Biol.* **69**, 233–245.
- DAXBOECK, C., BARNARD, D. K. AND RANDALL, D. J. (1981). Functional significance of the gills of the bowfin, *Amia calva*, with special reference to their significance during air-exposure. *Respir. Physiol.* **43**, 349–364.
- DEMPSEY, J. A., OLSON, E. B. AND SKATRUD, J. B. (1986). Hormones and neurochemicals in the regulation of breathing. In *Handbook of Physiology, The Respiratory System*, section 3, vol. II (ed. S. R. Geiger, A. P. Fishman, N. S. Cherniack and J. G. Widdicombe), pp. 181–221. Bethesda Maryland: American Physiological Society.
- FARRELL, A. P., MACLEOD, K. R. AND CHANCEY, B. (1986). Intrinsic mechanical properties of the perfused rainbow trout heart and the effects of catecholamines and extracellular calcium under control and acidotic conditions. *J. exp. Biol.* **125**, 319–345.
- FRITSCHER, R. AND NILSSON, S. (1989). Cardiovascular responses to hypoxia in the Atlantic cod, *Gadus morhua*. *Expl Biol.* **48**, 153–160.
- HUGHES, G. M. AND SHELTON, G. (1962). Respiratory mechanisms and their nervous control in fish. *Adv. comp. Physiol. Biochem.* **1**, 275–374.
- JOHANSEN, K., HANSON, D. AND LENFANT, C. (1970). Respiration in a primitive air breather, *Amia calva*. *Respir. Physiol.* **9**, 162–174.
- LAHIRI, S., SZIDON, J. P. AND FISHMAN, A. P. (1970). Potential respiratory and circulatory adjustments to hypoxia in the African lungfish. *A. Rev. Physiol.* **29**, 1141–1148.
- MCKENZIE, D. J., AOTA, S. AND RANDALL, D. J. (1991). Cardiovascular and ventilatory responses to blood pH, plasma P<sub>CO<sub>2</sub></sub>, blood O<sub>2</sub> content and catecholamines in an air-breathing fish, the Bowfin (*Amia calva*). *Physiol. Zool.* **64**, 432–450.
- MILSOM, W. K. AND BRILL, R. (1986). Oxygen sensitive afferent information arising from the first gill arch of yellowfin tuna. *Respir. Physiol.* **66**, 193–203.
- NAKANO, T. AND TOMLINSON, N. (1967). Catecholamine and carbohydrate concentrations in rainbow trout (*Salmo gairdneri*) in relation to physical disturbance. *J. Fish. Res. Bd Can.* **24**, 1701–1715.
- NEKVASIL, N. P. AND OLSON, K. R. (1986). Plasma clearance, metabolism and tissue accumulation of 3-H-labelled catecholamines in trout. *Am. J. Physiol.* **250**, R519–R525.
- RANDALL, D. J. (1982). The control of respiration and circulation in fish during exercise and hypoxia. *J. exp. Biol.* **100**, 275–288.
- RANDALL, D. J., CAMERON, J. N., DAXBOECK, C. AND SMATRESK, N. (1981). Aspects of bimodal gas exchange in the bowfin, *Amia calva* (Actinopterygii: Amiiformes). *Respir. Physiol.* **43**, 339–348.
- RANDALL, D. J. AND JONES, D. J. (1973). The effect of deafferentation of the pseudobranch on the respiratory responses to hypoxia and hyperoxia in the trout (*Salmo gairdneri*). *Respir. Physiol.* **17**, 291–301.
- RANDALL, D. J. AND TAYLOR, E. W. (1989). Circulating catecholamines and the control of ventilation. *Proc. Physiol. Soc.* 65p.
- SAUNDERS, R. L. AND SUTTERLIN, A. M. (1971). Cardiac and respiratory responses to hypoxia in the sea raven *Hemirhamphus americanus* and an investigation of possible control mechanisms. *J. Fish. Res. Bd Can.* **28**, 491–503.
- SMATRESK, N. J. (1986). Ventilatory and cardiac reflex responses to hypoxia and NaCN in *Lepisosteus osseus*, an air-breathing fish. *Physiol. Zool.* **59**, 385–397.
- SMATRESK, N. J. (1988). Control of the respiratory mode in air breathing fishes. *Can. J. Zool.* **66**, 144–151.
- SMATRESK, N. J. (1991). Effects of sectioning cranial nerves IX and X on hypoxic reflexes in an air-breathing fish (*Lepisosteus oculatus*). *Physiol. Zool.* (in press).
- SMATRESK, N. J., BURLESON, M. L. AND AZIZI, S. Q. (1986). Chemoreflexive responses to

- hypoxia and NaCN in longnose gar: evidence for two chemoreceptor loci. *Am. J. Physiol.* **251**, R116–R125.
- SMATRESK, N. J. AND CAMERON, J. N. (1982). Respiration and acid–base physiology of the spotted gar, a bimodal breather. I. Normal values and the responses to severe hypoxia. *J. exp. Biol.* **96**, 263–280.
- SMITH, F. M. AND JONES, D. R. (1978). Localisation of receptors causing hypoxic bradycardia in trout (*Salmo gairdneri*). *Can. J. Zool.* **56**, 1260–1265.
- SMITH, F. M. AND JONES, D. R. (1981). The effects of changes in blood oxygen-carrying capacity on ventilation volume in the rainbow trout (*Salmo gairdneri*). *J. exp. Biol.* **97**, 325–334.
- SOIVIO, A., NYHOLM, K. AND WESTMAN, K. (1972). A technique for repeated sampling of the blood of individual resting fish. *J. exp. Biol.* **62**, 207–217.
- TAYLOR, E. W. AND RANDALL, D. J. (1988). Control of ventilation in fish. In *Fish Physiology, Fish Toxicology and Fisheries Management: Proceedings of an International Symposium*. Guangzhou, P.R.C. Sept. 14–16, 1988 (ed. R. C. Ryan), pp. 146–156. Athens, Georgia: US Environmental Protection Agency.
- TUCKER, V. A. (1967). Method for oxygen content and dissociation curves on microliter blood samples. *J. appl. Physiol.* **23**, 410–414.
- WOOD, C. M. AND SHELTON, G. (1980). Cardiovascular dynamics and adrenergic responses of the rainbow trout *in vivo*. *J. exp. Biol.* **87**, 247–270.
- WOODWARD, J. J. (1982). Plasma catecholamines in resting rainbow trout, *Salmo gairdneri* Richardson, by high pressure liquid chromatography. *J. Fish Biol.* **21**, 429–432.
